# Supplementary material for: Impact of self-imposed prevention measures and short-term government-imposed social distancing on mitigating and delaying a COVID-19 epidemic: A modelling study
Source: PubMed Central journal article supplement (PMC7373263; doi:10.1371/journal.pmed.1003166), 2020-07-21

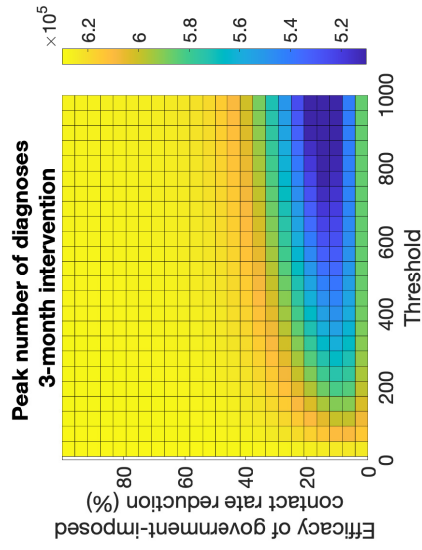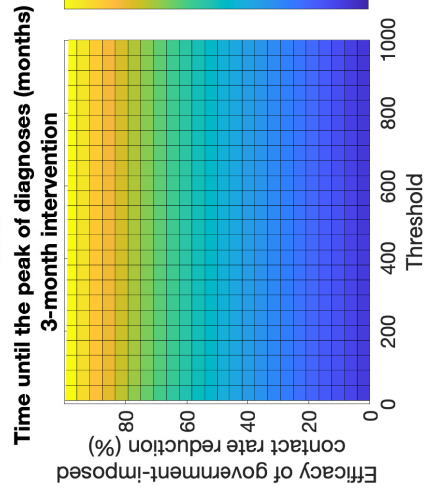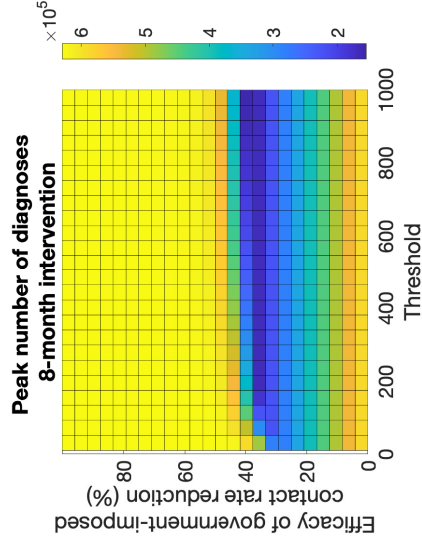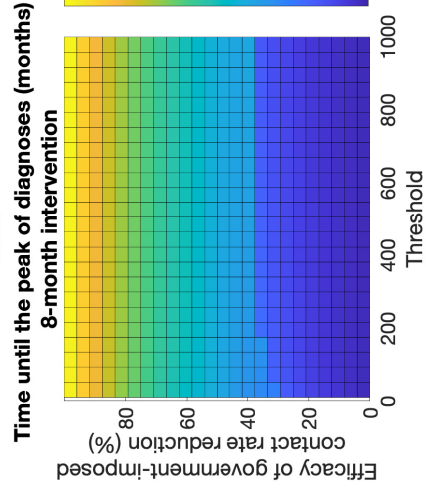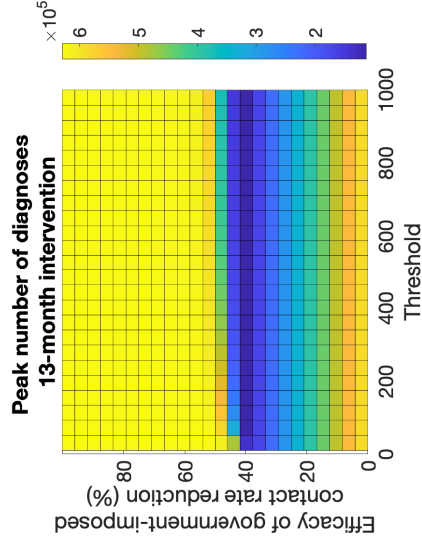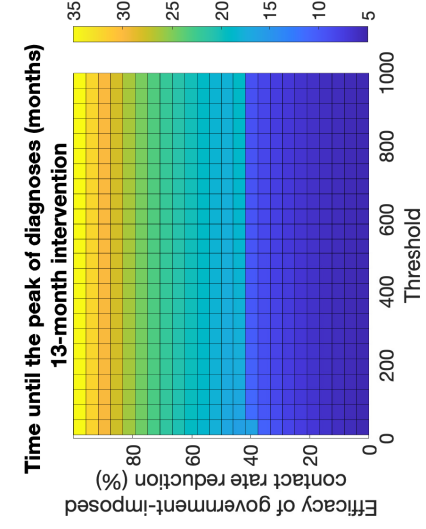

Supplement: pmed.1003166.s005.pdf [file pmed.1003166.s005.pdf]
